# Supplementary material for: De Novo Assembly of Chickpea Transcriptome Using Short Reads for Gene Discovery and Marker Identification
Source: PubMed Central journal article supplement — DNA Res. 2011 Jan 7;18(1):53–63. doi: 10.1093/dnares/dsq028 (PMC3041503; doi:10.1093/dnares/dsq028), 2011-01-07
Supplement: supp_dsq028_dsq028supp_table1.pdf [file supp_dsq028_dsq028supp_table1.pdf]

**Supplementary Table 1.** Assembly statistics using Velvet with different datasets and k-mer length.

**A) Untrimmed dataset (72 bp PE and 51 bp SE reads)**

|                             | <b>k21</b> | <b>k27</b> | <b>k31</b> | <b>k37</b> | <b>k41</b> | <b>k47</b> | <b>k51</b> | <b>k57</b> |
|-----------------------------|------------|------------|------------|------------|------------|------------|------------|------------|
| Total reads                 | 106660317  | 106660317  | 106660317  | 106660317  | 106660317  | 106660317  | 106660317  | 106660317  |
| Used reads                  | 32617049   | 40551794   | 49956688   | 67686347   | 72612054   | 78488661   | 78281592   | 38738624   |
| Unused reads                | 74043268   | 66108523   | 56703629   | 38973970   | 34048263   | 28171656   | 28378725   | 67921693   |
| Nodes                       | 8396251    | 49716222   | 3002698    | 567053     | 318946     | 127384     | 85118      | 57177      |
| Contigs total               | 756897     | 527990     | 396815     | 205238     | 141904     | 81354      | 66894      | 52169      |
| Contigs $\geq 100$ bp       | 155575     | 195310     | 207955     | 150978     | 115324     | 74651      | 66894      | 52169      |
| N50 (bp)                    | 157        | 178        | 198        | 337        | 453        | 675        | 607        | 540        |
| Largest contig length (bp)  | 1317       | 2303       | 2668       | 4605       | 6785       | 7827       | 7554       | 7086       |
| Smallest contig length (bp) | 100        | 100        | 100        | 100        | 100        | 100        | 101        | 113        |
| Average contig length (bp)  | 159.95     | 175.9      | 189.86     | 270.31     | 329.96     | 431.98     | 419.57     | 423.43     |

**B) Trimmed dataset 1 (70 bp PE and 50 bp SE reads)**

|                             | <b>k21</b> | <b>k27</b> | <b>k31</b> | <b>k37</b> | <b>k41</b> | <b>k47</b> | <b>k51</b> | <b>k57</b> |
|-----------------------------|------------|------------|------------|------------|------------|------------|------------|------------|
| Total reads                 | 106660317  | 106660317  | 106660317  | 106660317  | 106660317  | 106660317  | 106660317  | 106660317  |
| Used reads                  | 34389925   | 44141062   | 51194827   | 69433394   | 74403005   | 79986893   | 39706594   | 38797979   |
| Unused reads                | 72270392   | 62519255   | 55465490   | 37226923   | 32257312   | 26673424   | 66953723   | 67862338   |
| Nodes                       | 7573218    | 4258282    | 2769881    | 500223     | 274704     | 111293     | 78519      | 53702      |
| Contigs total               | 741362     | 503712     | 379092     | 191219     | 130394     | 76672      | 64305      | 50096      |
| Contigs $\geq 100$ bp       | 157409     | 195331     | 202363     | 143385     | 108086     | 71217      | 64305      | 50096      |
| N50 (bp)                    | 160        | 184        | 204        | 358        | 486        | 683        | 594        | 504        |
| Largest contig length (bp)  | 1339       | 2329       | 2668       | 4339       | 7572       | 7666       | 7110       | 7084       |
| Smallest contig length (bp) | 100        | 100        | 100        | 100        | 100        | 100        | 101        | 113        |
| Average contig length (bp)  | 161.77     | 179.98     | 193051     | 280.01     | 343.82     | 436.49     | 418.13     | 408.94     |

**C) Trimmed dataset 2 (65 bp PE and 50 bp SE reads)**

|                             | <b>k21</b> | <b>k27</b> | <b>k31</b> | <b>k37</b> | <b>k41</b> | <b>k47</b>       | <b>k51</b> | <b>k57</b> |
|-----------------------------|------------|------------|------------|------------|------------|------------------|------------|------------|
| Total reads                 | 106660317  | 106660317  | 106660317  | 106660317  | 106660317  | <b>106660317</b> | 106660317  | 106660317  |
| Used reads                  | 40442090   | 49556384   | 65419186   | 74469209   | 79329234   | <b>82976402</b>  | 40540612   | 36361498   |
| Unused reads                | 66218227   | 57103933   | 41241131   | 32191108   | 27331083   | <b>23683915</b>  | 66119705   | 70298819   |
| Nodes                       | 5767585    | 3383351    | 900830     | 349562     | 185318     | <b>84864</b>     | 65107      | 39456      |
| Contigs total               | 703059     | 455997     | 296061     | 156087     | 103030     | <b>66646</b>     | 58561      | 38502      |
| Contigs $\geq 100$ bp       | 163740     | 188548     | 173048     | 124200     | 89671      | <b>63365</b>     | 58561      | 38502      |
| N50 (bp)                    | 168        | 200        | 279        | 444        | 642        | <b>730</b>       | 518        | 381        |
| Largest contig length (bp)  | 1597       | 2730       | 3754       | 8335       | 10616      | <b>7171</b>      | 7109       | 5126       |
| Smallest contig length (bp) | 100        | 100        | 100        | 100        | 100        | <b>100</b>       | 101        | 113        |
| Average contig length (bp)  | 167.75     | 191.02     | 237.18     | 316.69     | 398.82     | <b>453.44</b>    | 394.34     | 351.53     |

The N50, largest, smallest and average contige length are given for only the contigs  $\geq 100$  bp.
