# Supplementary material for: De Novo Assembly of Chickpea Transcriptome Using Short Reads for Gene Discovery and Marker Identification
Source: PubMed Central journal article supplement — DNA Res. 2011 Jan 7;18(1):53–63. doi: 10.1093/dnares/dsq028 (PMC3041503; doi:10.1093/dnares/dsq028), 2011-01-07
Supplement: supp_dsq028_dsq028supp_table2.pdf [file supp_dsq028_dsq028supp_table2.pdf]

**Supplementary Table 2.** Assembly statistics using CLC Genomics Workbench with different datasets.

|                             | <b>Untrimmed dataset</b> | <b>Trimmed dataset 1</b> | <b>Trimmed dataset 2</b> |
|-----------------------------|--------------------------|--------------------------|--------------------------|
| Total reads                 | 106,660,317              | 106,660,317              | 106,660,317              |
| Matched reads               | 88,140,071               | 88,879,703               | 91,038,792               |
| Not matched reads           | 18,520,246               | 17,780,614               | 15,621,525               |
| Contigs total               | 128,281                  | 123,737                  | 114,708                  |
| Contigs $\geq 100$ bp       | 127,272                  | 122,790                  | 113,893                  |
| N50 (bp)                    | 978                      | 1,029                    | 1,151                    |
| Largest contig length (bp)  | 15,709                   | 15,684                   | 15,684                   |
| Smallest contig length (bp) | 100                      | 100                      | 100                      |
| Average contig length (bp)  | 398.32                   | 406.40                   | 428.47                   |

The N50, largest, smallest and average contige length are given for only the contigs  $\geq 100$  bp.
