# Supplementary material for: De Novo Assembly of Chickpea Transcriptome Using Short Reads for Gene Discovery and Marker Identification
Source: PubMed Central journal article supplement — DNA Res. 2011 Jan 7;18(1):53–63. doi: 10.1093/dnares/dsq028 (PMC3041503; doi:10.1093/dnares/dsq028), 2011-01-07
Supplement: supp_dsq028_dsq028supp_table3.pdf [file supp_dsq028_dsq028supp_table3.pdf]

**Supplementary Table 3.** Examples of transcription factor families showing events of expansion and contraction in chickpea as compared to other legumes.

| <b>Transcription factor family</b> | <b>Chickpea</b> | <b>Soybean</b> | <b><i>Medicago</i></b> | <b><i>Lotus</i></b> |
|------------------------------------|-----------------|----------------|------------------------|---------------------|
| ABI3VP1                            | 103             | 78             | 85                     | 34                  |
| AUX/IAA-ARF                        | 216             | 129            | 24                     | 36                  |
| bHLH                               | 488             | 393            | 71                     | 84                  |
| C2C2-CO-like                       | 15              | 72             | 15                     | 21                  |
| C2C2-GATA                          | 49              | 62             | 29                     | 16                  |
| C2C2-YABBY                         | 8               | 18             | 6                      | 4                   |
| C3H                                | 594             | 147            | 41                     | 50                  |
| CAMTA                              | 26              | 15             | 6                      | 4                   |
| CCAAT                              | 62              | 106            | 22                     | 25                  |
| FHA                                | 196             | 33             | 9                      | 10                  |
| HSF                                | 36              | 11             | 16                     | 18                  |
| LIM                                | 12              | 42             | 9                      | 12                  |
| MADS                               | 433             | 212            | 60                     | 83                  |
| MYB                                | 528             | 791            | 171                    | 191                 |
| NAC                                | 499             | 208            | 64                     | 101                 |
| PHD                                | 489             | 222            | 45                     | 47                  |
| RWP-RK                             | 131             | 23             | 5                      | 12                  |
| SBP                                | 101             | 48             | 11                     | 15                  |
| SNF2                               | 347             | 69             | 17                     | 23                  |
| TAZ                                | 17              | 1              | 5                      | 2                   |
| zf-HD                              | 21              | 54             | 13                     | 18                  |

Number of genes/transcripts encoding for various transcription factor families is given.

The data of chickpea is from our study, and the data for soybean, *Medicago* and *Lotus* is from Libault et al., 2009 (Plant Physiology, Vol 151, 991-1001).
